# Supplementary material for: High throughput circRNA sequencing analysis reveals novel insights into the mechanism of nitidine chloride against hepatocellular carcinoma
Source: PubMed Central journal article supplement (PMC6737102; doi:10.1038/s41419-019-1890-9), 2019-09-10

**High throughput circRNA sequencing analysis reveals novel insights into the mechanism of nitidine chloride against hepatocellular carcinoma**

**Running title: circRNA as therapeutic target of nitidine chloride in hepatocellular carcinoma**

Dan-dan Xiong<sup>1\*</sup>, Zhen-bo Feng<sup>1\*</sup>, Ze-feng Lai<sup>2</sup>, Yue Qin<sup>2</sup>, Li-min Liu<sup>3</sup>, Hao-xuan Fu<sup>2</sup>, Rong-quan He<sup>4</sup>, Hua-yu Wu<sup>5</sup>, Yi-wu Dang<sup>1#</sup>, Gang Chen<sup>1#</sup>, Dian-zhong Luo<sup>1</sup>

<sup>1</sup>Department of Pathology, First Affiliated Hospital of Guangxi Medical University, Nanning, China

<sup>2</sup>Pharmaceutical College, Guangxi Medical University, Nanning, China

<sup>3</sup>Department of Toxicology, Pharmaceutical College, Guangxi Medical University, Nanning, China

<sup>4</sup>Department of Medical Oncology, First Affiliated Hospital of Guangxi Medical University, Nanning, China

<sup>5</sup>Department of Cell Biology & Genetics, School of Preclinical Medicine, Guangxi Medical University, Nanning, China

**Corresponding authors:**

Professor Dr. Gang Chen, Department of Pathology, First Affiliated Hospital of Guangxi Medical University, No. 6. Shuangyong Rd., Nanning, Guangxi Zhuang Autonomous Region, 530021, P.R. China.  
Email: chengang@gxmu.edu.cn. Tel: +8615277192143

Yi-wu Dang, Department of Pathology, First Affiliated Hospital of Guangxi Medical University, No. 6. Shuangyong Rd., Nanning, Guangxi Zhuang Autonomous Region, 530021, P.R. China. Email: dangyiwu@126.com. Tel: +8613737034122

\* These authors contributed equally to this work

Supplementary Fig S1

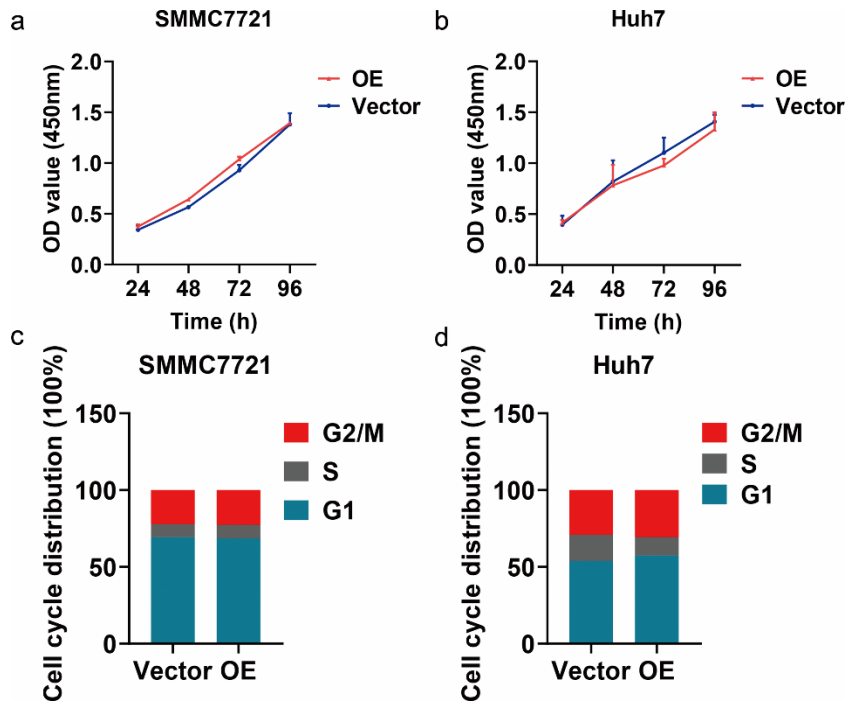

Supplementary Fig S2

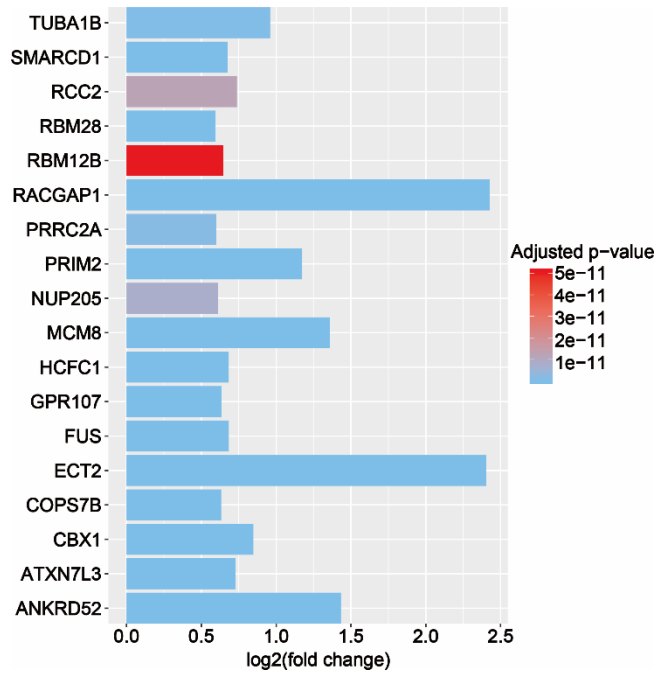

# Supplementary Fig S3

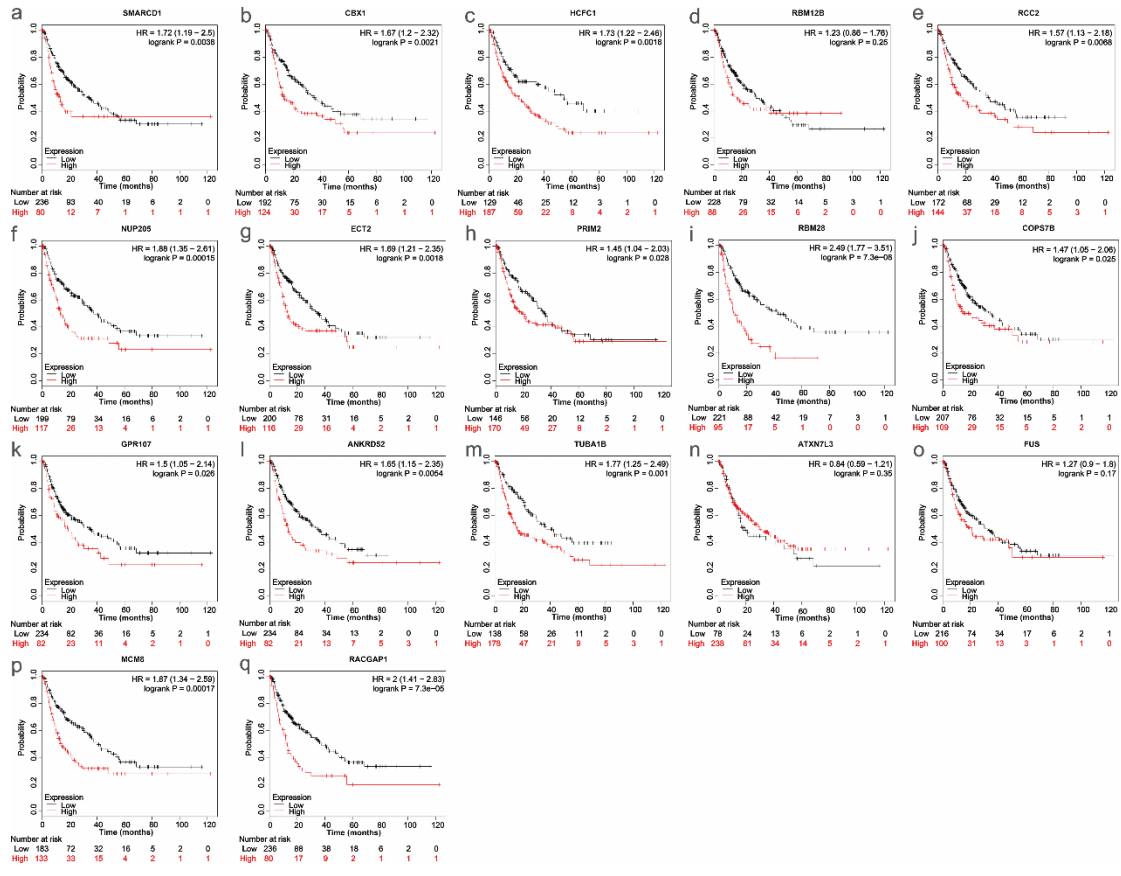

# Supplementary Fig S4

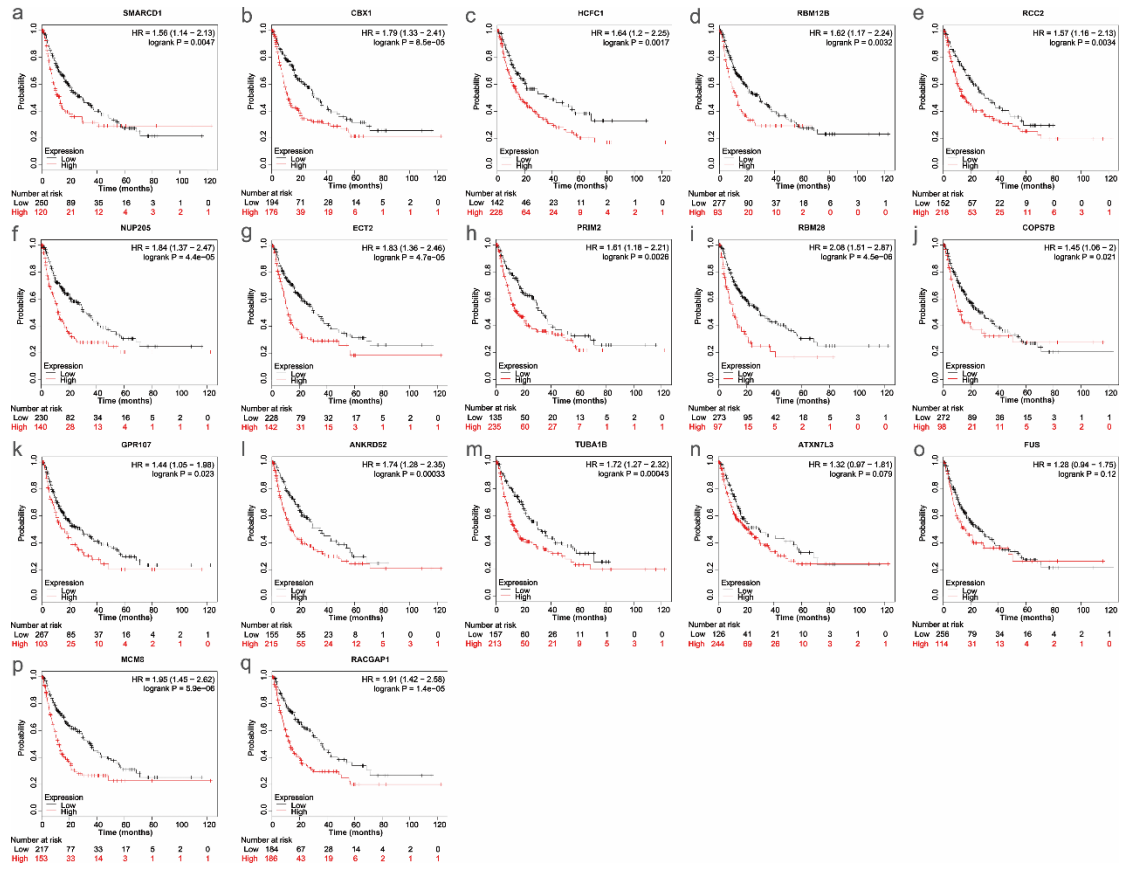

Supplementary Fig S5

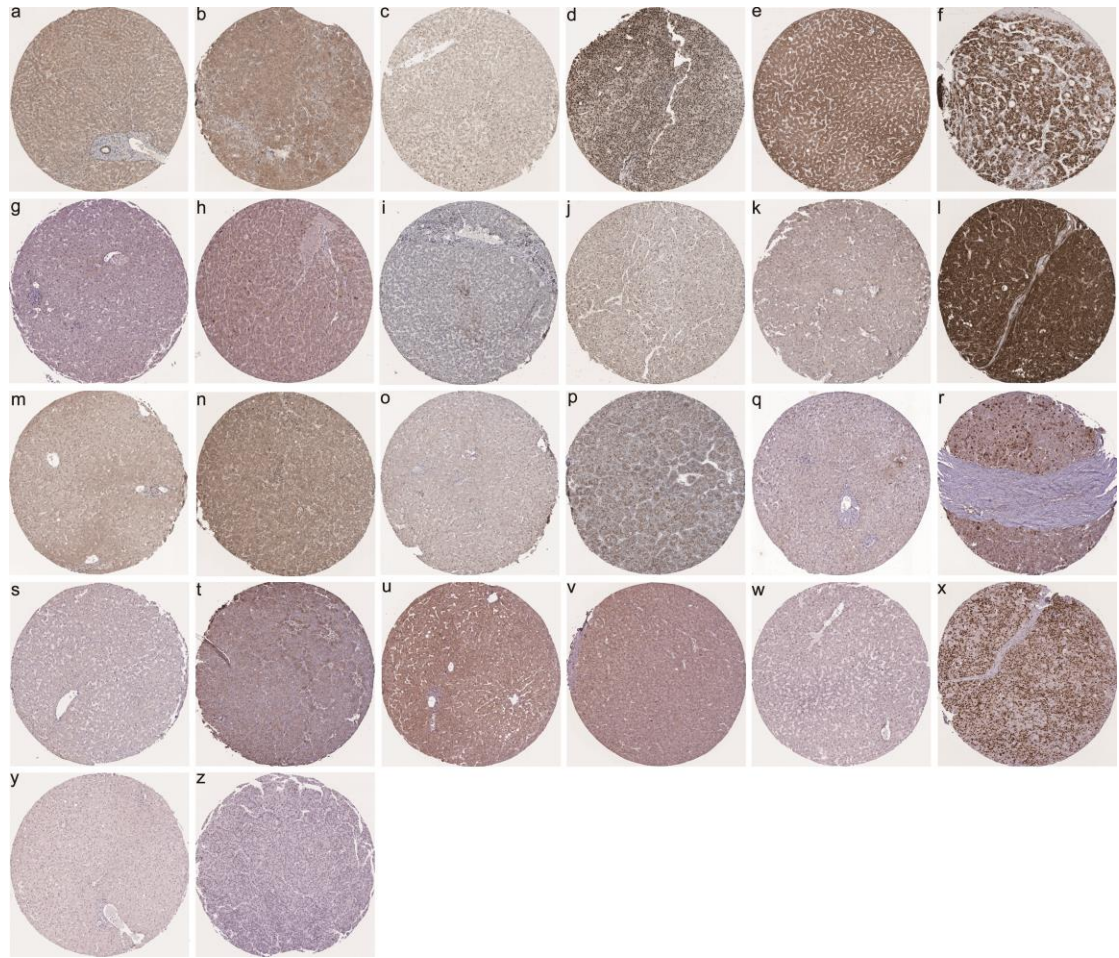

Supplement: 41419_2019_1890_MOESM1_ESM.pdf [file 41419_2019_1890_MOESM1_ESM.pdf]
